# Supplementary material
Source: bioRxiv or medRxiv preprint supplement (https://www.biorxiv.org/highwire/filestream/7580/field_highwire_adjunct_files/0/026070-1.pdf)
Supplement: Supplementary file [file 026070-1.pdf]

# Bayesian inference elucidates the varying dynamics of alternative end joining mechanisms.

M. Woods and C.P. Barnes

## SUPPLEMENTARY APPENDIX

### I Biochemical kinetic models, initial conditions and priors

Our model consists of two reactions for each repair mechanism, giving a maximum total of six reactions for each data set:

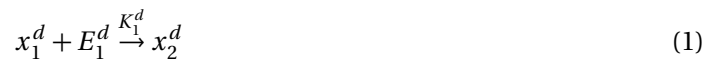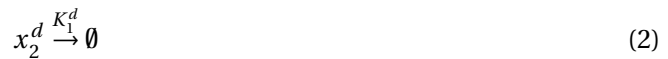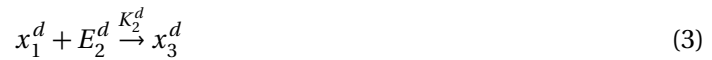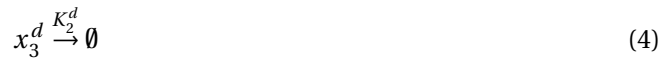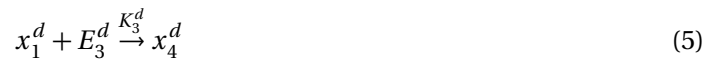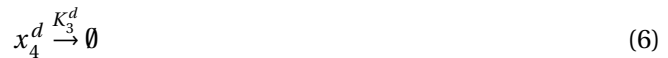

where  $x_i^d$ , for  $i \in \{1, 2, 3, 4\}$  is the state of a double strand break (DSB) for dataset  $d$ .  $K_i^d$  and  $E_i^d$  for  $i \in \{1, 2, 3\}$  are the parameter and recruitment protein for dataset  $d$  and repair mechanism  $i$ . Each model  $d$  has three conservation equations

$$E_1^d + x_2^d = C_1^d \quad (7)$$

$$E_2^d + x_3^d = C_2^d \quad (8)$$

$$E_3^d + x_4^d = C_3^d, \quad (9)$$

18 where  $C_i^d$  is the total amount of recruitment protein for dataset  $d$  and repair mechanism  $i$ . If for  
 19 any mechanism, the first protein to bind is repressed, then we remove all reactions corresponding to  
 20 that mechanism. If a protein downstream of the first protein to bind is repressed, then we remove the  
 21 reaction corresponding to end ligation for that mechanism. When the reactions are taken to be deter-  
 22 ministic, the wild type system can be described by the following set of nonlinear ordinary differential  
 23 equations.

$$\frac{dx_1}{dt} = V - x_1(K_1 E_1 + K_2 E_2 + K_3 E_3) \quad (10)$$

$$\frac{dx_2}{dt} = K_1(E_1 x_1 - 1) \quad (11)$$

$$\frac{dx_3}{dt} = K_2(E_2 x_1 - 1) \quad (12)$$

$$\frac{dx_4}{dt} = K_3(E_3 x_1 - 1) \quad (13)$$

27 This system of equations can be solved numerically, however we are interested in making pre-  
 28 dictions for single cell data and so we solve the stochastic model. To determine the most probable  
 29 set of parameters to give rise to the experimental data - termed the posterior distribution - we apply  
 30 approximate Bayesian computation sequential Monte Carlo.

## 31 **2 Approximate Bayesian computation**

In the Bayesian framework, we are interested in the posterior distribution  $\pi_\epsilon(\theta, x|y)$ , where  $\theta$  is a  
 vector of parameters and  $x|y$  is the simulated data conditioned on the experimental data. To obtain  
 samples from the posterior distribution we must condition on the data  $y$  and this is done via an  
 indicator function  $I_{\mathcal{A}_{y,\epsilon}}(x)$ . We then have

$$\pi_\epsilon(\theta, x|y) = \frac{\pi(\theta)f(x|\theta)I_{\mathcal{A}_{y,\epsilon}}(x)}{\int_{\mathcal{A}_{y,\epsilon} \times \Theta} \pi(\theta)f(x|\theta)dx d\theta},$$

32 where  $\mathcal{A}_{y,\epsilon} = \{x \in \mathcal{D} : \rho(x, y) \leq \epsilon\}$ ,  $\rho : \mathcal{D} \times \mathcal{D} \rightarrow R^+$  is a distance function comparing the simulated data  
 33 to the observed data and  $\pi_\epsilon$  is an approximation to the true posterior distribution. This approxima-  
 34 tion is obtained via an algorithm that repetitively samples from the parameter space until  $\epsilon$  is small  
 35 such that the resulting approximate posterior,  $\pi_\epsilon$ , is close to the true posterior. There are different  
 36 algorithms that can be applied to obtain this approximation. We use the method of sequential im-  
 37 portance sampling or more specifically ABC SMC, which is implemented in the software ABC-SysBio.  
 38 For further details on the algorithms available in ABC-SysBio see [1–4].

## 39 **3 The hierarchical model**

40 We have modified the software ABC-SysBio to include an option to perform ABC SMC on a hier-  
 41 archical model structure. In our hierarchical framework, we wish to obtain  $K_i^d$  for three processes  
 42  $i \in \{1, 2, 3\}$  and eight datasets  $d \in \{1, \dots, 8\}$ . These parameters are in some sense nuisance variables,

43 with “true parameters” (or parameters of interest)  $\mu_{1-5}$ . The  $\mu_{1-4}$  represent the means of four lognor-  
 44 mal distributions and  $\mu_5$  the variance. The  $K_i^d$  are drawn from these population level distributions.  
 45 In this case, the joint density can be written

$$p(y, K, \mu) = p(y|K, \mu)p(K|\mu)p(\mu) \quad (14)$$

46 where Bayes rule becomes

$$p(\mu|y) = \frac{p(\mu) \int p(y|K, \mu)p(K|\mu)}{p(y)}. \quad (15)$$

47 This is the posterior of the hyper parameters given the data,  $y$ . The integral indicates that we sum over  
 48 (marginalise) the  $K$  values. We can include this into ABC by simulating data  $x^*$  using the following  
 49 scheme:

$$\mu \sim U(\alpha, \beta)$$

$$K \sim LN(\mu, \sigma)$$

$$x^* \sim f(x|K)$$

50 In our study,  $f(x|K)$  is the data generating model, and is the solution to the reaction systems pre-  
 51 sented in section 1. We perturb only the  $\mu$  but the distance is calculated on the simulation using the  
 52 sampled  $K$  values.

53

54 The model prior distributions for the hyper parameters were fixed across all datasets and had the  
 55 following limits:

56

57 **Hierarchical priors:**  $\mu_1 \sim U(1, 4)$ ,  $\mu_2 \sim U(-4, -1)$ ,  $\mu_3 \sim U(-2, 4)$ ,  $\mu_4 \sim U(-4, -1)$ ,  $\mu_5 \sim U(0.05, 0.9)$ .

58

59 The total amount of protein and initial conditions were set according to the data.

60

61 **constant:**  $C_1 = 700$ ,  $C_2 = 700$ ,  $C_3 = 700$ ,  $C_4 = 2800$ ,  $C_5 = 2800$ ,  $C_6 = 1906$ ,  $C_7 = 1814$  and  $C_8 = 1128.7$ .

62

63 **Recruitment protein initial conditions:**  $E_1^1(0) = 700$ ,  $E_2^1(0) = 700$ ,  $E_3^1(0) = 700$ ,  $E_1^2(0) = 700$ ,  $E_2^2(0) = 700$ ,  
 64  $E_3^2(0) = 700$ ,  $E_1^3(0) = 700$ ,  $E_2^3(0) = 700$ ,  $E_3^3(0) = 700$ ,  $E_1^4(0) = 2800$ ,  $E_2^4(0) = 2800$ ,  $E_3^4(0) = 2800$ ,  $E_2^5(0) =$   
 65  $2800$ ,  $E_3^5(0) = 2800$ ,  $E_2^6(0) = 1906$ ,  $E_3^6(0) = 1906$ ,  $E_2^7(0) = 1814$ ,  $E_1^8(0) = 1128.7$ ,  $E_2^8(0) = 1128.7$ .

66

67 **State vector initial conditions:**  $x_1^1(0) = 700$ ,  $x_2^1(0) = 0$ ,  $x_3^1(0) = 0$ ,  $x_4^1(0) = 0$ ,  $x_1^2(0) = 700$ ,  $x_2^2(0) = 0$ ,  $x_3^2(0) =$   
 68  $0$ ,  $x_4^2(0) = 0$ ,  $x_1^3(0) = 700$ ,  $x_2^3(0) = 0$ ,  $x_3^3(0) = 0$ ,  $x_4^3(0) = 0$ ,  $x_1^4(0) = 2800$ ,  $x_2^4(0) = 0$ ,  $x_3^4(0) = 0$ ,  $x_4^4(0) = 0$ ,  
 69  $x_1^5(0) = 2800$ ,  $x_2^5(0) = 0$ ,  $x_3^5(0) = 0$ ,  $x_4^5(0) = 0$ ,  $x_1^6(0) = 1906$ ,  $x_2^6(0) = 0$ ,  $x_3^6(0) = 0$ ,  $x_4^6(0) = 0$ ,  $x_1^7(0) = 1814$ ,  
 70  $x_2^7(0) = 0$ ,  $x_3^7(0) = 0$ ,  $x_4^7(0) = 0$ ,  $x_1^8(0) = 1128.7$ ,  $x_2^8(0) = 0$ ,  $x_3^8(0) = 0$ ,  $x_4^8(0) = 0$ .

## 71 **4 The cumulative number of DSBs**

72 Proportions of DSBs repaired by each mechanism are estimated by calculating the cumulative num-  
73 ber of DSBs that enter each individual pathway with the density weighted integral,

$$G_j^d(t) \Big|_{t=T} = - \int_0^{t=T} \sigma_j^d(t) X^{d'}(t) dt, \quad (16)$$

$$\sigma_j^d(t) = \frac{x_{j+1}^d(t)}{\sum_{k \in \{2,3,4\}} x_k^d(t)}. \quad (17)$$

74 Equation 16 is the product of the change in total DSBs and density  $\sigma_j(t)$ ,  $j \in \{1, 2, 3\}$  of DSBs in repair  
75 mechanism  $j$  integrated over time. This contribution to the overall repair can be used to predict the  
76 proportion of DSBs  $P_j \forall j \in R$  repaired by each mechanism:

$$P_j = G_j(T)/X(T). \quad (18)$$

77 Where  $G_j(T)$  is the total amount of DSBs repaired by mechanism  $j$  at time  $T$ .

## 78 **References**

- 79 [1] Toni, T., Welch, D., Strelkova, N., Ipsen, A., and Stumpf, M. P. H. (2009) Approximate Bayesian  
80 computation scheme for parameter inference and model selection in dynamical systems.. *Journal*  
81 *of the Royal Society, Interface / the Royal Society*, **6**(31), 187–202.
- 82 [2] Liepe, J., Barnes, C., Cule, E., Erguler, K., Kirk, P., Toni, T., and Stumpf, M. P. (2010) ABC-SysBio–  
83 approximate Bayesian computation in Python with GPU support. *Bioinformatics*, **26**(14), 1797–  
84 1799.
- 85 [3] Toni, T. and Stumpf, M. P. H. (2010) Simulation-based model selection for dynamical systems in  
86 systems and population biology.. *Bioinformatics*, **26**(1), 104–110.
- 87 [4] Liepe, J., Kirk, P., Filippi, S., Toni, T., Barnes, C. P., and Stumpf, M. P. H. (2014) A framework for  
88 parameter estimation and model selection from experimental data in systems biology using ap-  
89 proximate Bayesian computation.. *Nature protocols*, **9**(2), 439–456.

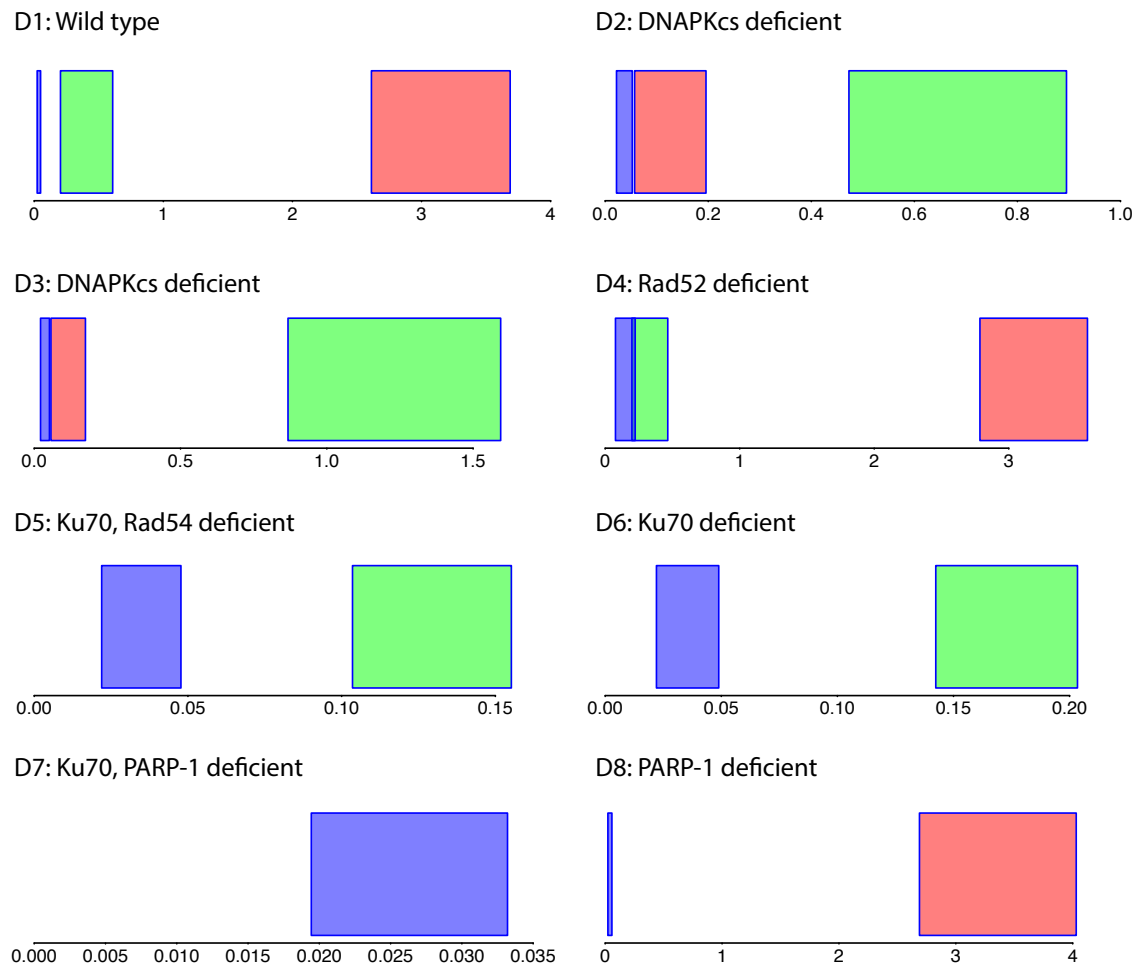

Figure S1: The interquartile range for all the parameters in each dataset. Red (fast repair), blue (slow repair) and green (intermediate repair).

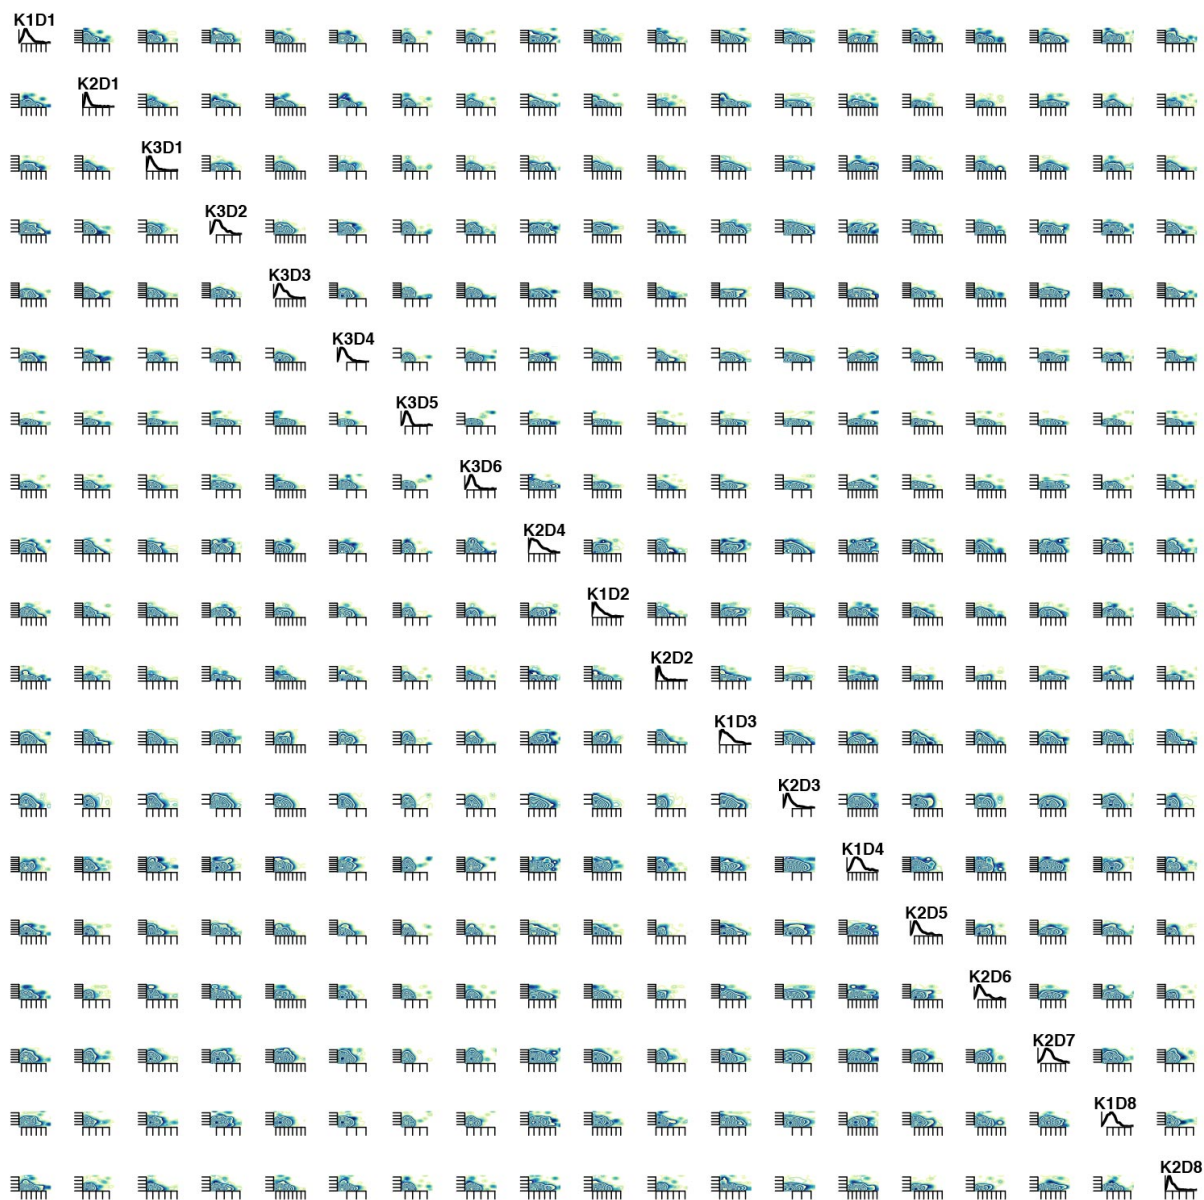

Figure S2: Posterior of the latent parameters  $K_i^d$ .
